# Supplementary material
Source: PubMed Central journal article supplement (PMC10772108)
Supplement: 41431_2023_1395_MOESM4_ESM.pdf [file 41431_2023_1395_MOESM4_ESM.pdf]

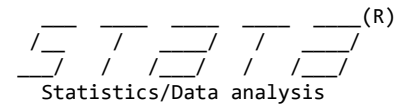

User: Jane Tiller  
Project: at-risk notification

---

```

name: <unnamed>
log: /Users/keri.finlay/Documents/Stata/logfile_survey.smcl
log type: smcl
opened on: 15 Sep 2022, 13:46:19

```

```

1 . do "/Users/keri.finlay/Documents/Stata/ConsumerSurveyDynata-ForAnalysis_STATA_2022-08-24_1003 (1).do"

2 . * Name: Keri FInlay
3 . * Date: Aug 2022
4 . * Purpose: Data Analysis of consumer survey
5 .
6 .
7 . *change directory
8 . cd "/Users/keri.finlay/Documents/Stata/"
   /Users/keri.finlay/Documents/Stata

9 .
10 . version 13

11 . clear

12 .
13 . import delimited record_id redcap_survey_identifider notification_of_medi_v_0 cs_birth_year cs_sex cs_state cs_area_t
   > s_edu cs_thoughts cs_letter1_thoughts cs_letter1_thoughts_other cs_letter1_difficulty cs_letter2_thoughts cs_letter2
   > ghts_other cs_letter2_difficulty cs_letter_preference cs_letters_comments cs_contact_preference cs_contact_pref_comm
   > s_privacy_concerns cs_privacy_concerns_little cs_privacy_concerns_signif cs_non_priv_concerns cs_non_priv_concerns_s
   > cs_non_priv_concerns_little cs_contact_ways cs_contact_ways_preference cs_fam_contact_preference cs_fam_contact_pre
   > es cs_general_comments notification_of_medi_v_1 using "/Users/keri.finlay/Documents/Stata/ConsumerSurveyDynata-ForAn
   > s_DATA_NOHDRS_2022-08-24_1003.csv", varnames(nonames)
   (31 vars, 1,030 obs)

14 .
15 . label data "ConsumerSurveyDynata-ForAnalysis_DATA_NOHDRS_2022-08-24_1003.csv"

16 .
17 . label define cs_sex_1 "Male" 2 "Female" 999 "Other"

18 . label define cs_state_1 "Australian Capital Territory" 2 "New South Wales" 3 "Northern Territory" 4 "Queensland" 5
   > h Australia" 6 "Tasmania" 7 "Victoria" 8 "Western Australia"

19 . label define cs_area_type_1 "Rural" 2 "Urban"

20 . label define cs_edu_1 "Before year 12" 2 "Year 12" 3 "TAFE/diploma" 4 "Undergraduate degree" 5 "Post-graduate degre

21 . label define cs_thoughts_1 "I would want to be contacted and told that this information exists, and be given the op
   > to find out more or not" 2 "I would want to be contacted and told up-front what this information is and what the hea
   > rks to me are" 3 "I would not want to be contacted to be offered this type of genetic information"

22 . label define cs_letter1_thoughts_1 "I would have felt better informed if the genetic condition had been included in
   > letter" 2 "Including the genetic condition in the letter would have been overwhelming for me at this early stage" 3
   > r (please elaborate) {cs_letter1_thoughts_other}"

23 . label define cs_letter1_difficulty_1 "Very easy to understand" 2 "Easy enough to understand" 3 "A bit difficult to
   > stand" 4 "Very difficult to understand"

24 . label define cs_letter2_thoughts_1 "I felt better informed from this letter than from the previous letter" 2 "It fe
   > erwhelming to have that level of information at this early stage" 3 "Other (please elaborate) {cs_letter2_thoughts_o
   > "

25 . label define cs_letter2_difficulty_1 "Very easy to understand" 2 "Easy enough to understand" 3 "A bit difficult to
   > stand" 4 "Very difficult to understand"

```

```
26 . label define cs_letter_preference_1 "Letter 1 (no specific information about the genetic condition)" 2 "Letter 2 (s
> ic information about the genetic condition)" 3 "No preference"

27 . label define cs_contact_preference_1 "A health professional sent me the letter directly" 2 "My family member provid
> with the letter" 3 "A health professional sent me the letter directly, but my family member also contacted me to ex
> or prepare me" 4 "It would depend on who the family member was as to whether I would prefer to be contacted by them
> health professional" 5 "I wouldnt mind whether a family member or a health professional provided me with the letter
> I would prefer not to be told this information at all"

28 . label define cs_privacy_concerns_1 "No concerns" 2 "A little concern (please elaborate) {cs_privacy_concerns_little
> }" 3 "Significant concerns (please elaborate) {cs_privacy_concerns_signif}"

29 . label define cs_non_priv_concerns_1 "No concerns" 2 "A little concern (please elaborate) {cs_non_priv_concerns_litt
> }" 3 "Significant concerns (please elaborate) {cs_non_priv_concerns_signif}"

30 . label define cs_contact_ways_preference_1 "A phone call" 2 "A text message" 3 "A letter by post" 4 "A letter by ema
> il" 5 "None" 100 "No preference"

31 . label define cs_fam_contact_preference_1 "Yes" 0 "No" 2 "Unsure"

32 . label define notification_of_medi_v_1_0 "Incomplete" 1 "Unverified" 2 "Complete"

33 .
34 . label values cs_sex cs_sex_
35 . label values cs_state cs_state_
36 . label values cs_area_type cs_area_type_
37 . label values cs_edu cs_edu_
38 . label values cs_thoughts cs_thoughts_
39 . label values cs_letter1_thoughts cs_letter1_thoughts_
40 . label values cs_letter1_difficulty cs_letter1_difficulty_
41 . label values cs_letter2_thoughts cs_letter2_thoughts_
42 . label values cs_letter2_difficulty cs_letter2_difficulty_
43 . label values cs_letter_preference cs_letter_preference_
44 . label values cs_contact_preference cs_contact_preference_
45 . label values cs_privacy_concerns cs_privacy_concerns_
46 . label values cs_non_priv_concerns cs_non_priv_concerns_
47 . label values cs_contact_ways_preference cs_contact_ways_preference_
48 . label values cs_fam_contact_preference cs_fam_contact_preference_
49 . label values notification_of_medi_v_1 notification_of_medi_v_1_

50 .
51 .
52 .
53 . label variable record_id "Record ID"

54 . label variable redcap_survey_identifier "Survey Identifier"
```

```
55 . label variable notification_of_medi_v_0 "Survey Timestamp"
56 . label variable cs_birth_year "Year of birth"
57 . label variable cs_sex "Sex"
58 . label variable cs_state "State of residence"
59 . label variable cs_area_type "I live in an area that is"
60 . label variable cs_edu "Highest level of education attained "
61 . label variable cs_thoughts "What are your thoughts about being told (by a health professional) about genetic informa
> that might show that you are at risk for future health problems that can be prevented (or detected and treated early
> is is a hypothetical question - we will not contact you to offer you genetic information."
note: label truncated to 80 characters
62 . label variable cs_letter1_thoughts "You may have noticed that the letter (Letter 1) did not say which genetic condit
> our hypothetical family member's test relates to. Please select the option that best reflects your thoughts about th
note: label truncated to 80 characters
63 . label variable cs_letter1_thoughts_other "Please elaborate"
64 . label variable cs_letter1_difficulty "How easy was Letter 1 to understand?"
65 . label variable cs_letter2_thoughts "This letter (Letter 2) is similar to Letter 1 but contains more information abou
> genetic condition. Please select the option that best reflects your thoughts about this:"
note: label truncated to 80 characters
66 . label variable cs_letter2_thoughts_other "Please elaborate"
67 . label variable cs_letter2_difficulty "How easy was Letter 2 to understand?"
68 . label variable cs_letter_preference "Having read both letters, which letter do you prefer? "
69 . label variable cs_letters_comments "Do you have any other comments about the two letters - for example, were there a
> pects of either letter that you werent comfortable with, or that you particularly liked? "
note: label truncated to 80 characters
70 . label variable cs_contact_preference "If you had the option to choose how you received this letter, which would you
> r?"
note: label truncated to 80 characters
71 . label variable cs_contact_pref_comment "Do you have any comments (optional)?"
72 . label variable cs_privacy_concerns "Would you have any privacy concerns about being sent a letter directly by a heal
> ofessional, using details provided to them by your relative? "
note: label truncated to 80 characters
73 . label variable cs_privacy_concerns_little "Please elaborate"
74 . label variable cs_privacy_concerns_signif "Please elaborate"
75 . label variable cs_non_priv_concerns "Would you have any other (non-privacy related) concerns about being sent a lett
> rectly in this way?"
note: label truncated to 80 characters
76 . label variable cs_non_priv_concerns_signif "Please elaborate"
77 . label variable cs_non_priv_concerns_little "Please elaborate"
78 . label variable cs_contact_ways "There are several ways of contacting family members who are unaware of their risk wi
> is type of genetic information. We have shown you a letter, which is one way. Which of these ways of contacting fami
> mbers do you think would be ok for a health professional to use?Select all that apply"
note: label truncated to 80 characters
```

```

79 . label variable cs_contact_ways_preference "Which of these ways of being contacted by a health professional would you
> er?"
note: label truncated to 80 characters

80 . label variable cs_fam_contact_preference "If a health professional contacted you in one of these ways, would you pre
> hat your family member contacted you first, to let you know that it was coming?"
note: label truncated to 80 characters

81 . label variable cs_fam_contact_pref_notes "If you answered [cs_fam_contact_preference], please provide an optional co
> mment if you'd like."
note: label truncated to 80 characters

82 . label variable cs_general_comments "Do you have any final comments about any of the matters raised in this questionn
> aire?"
note: label truncated to 80 characters

83 . label variable notification_of_medi_v_1 "Complete?"

84 .

85 . order record_id redcap_survey_identifier notification_of_medi_v_0 cs_birth_year cs_sex cs_state cs_area_type cs_edu
> cation cs_letter1_thoughts cs_letter1_thoughts_other cs_letter1_difficulty cs_letter2_thoughts cs_letter2_thoughts_o
> ther cs_letter2_difficulty cs_letter_preference cs_letters_comments cs_contact_preference cs_contact_pref_comment cs_priv
> acy cs_privacy_concerns_little cs_privacy_concerns_signif cs_non_priv_concerns cs_non_priv_concerns_signif cs_no
> n_priv_concerns_little cs_contact_ways cs_contact_ways_preference cs_fam_contact_preference cs_fam_contact_pref_notes cs_
> al_comments notification_of_medi_v_1

86 . set more off

87 . describe

```

Contains data  
Observations: 1,030 ConsumerSurveyDynata-ForAnalysis\_DATA\_NOHDRS\_2022-08-24\_1003.csv  
Variables: 31

| Variable name              | Storage type | Display format | Value label            | Variable label                                                                                   |
|----------------------------|--------------|----------------|------------------------|--------------------------------------------------------------------------------------------------|
| record_id                  | int          | %8.0g          |                        | Record ID                                                                                        |
| redcap_survey_id           | byte         | %8.0g          |                        | Survey Identifier                                                                                |
| notification_of_medi_v_0   | str19        | %19s           |                        | Survey Timestamp                                                                                 |
| cs_birth_year              | int          | %8.0g          |                        | Year of birth                                                                                    |
| cs_sex                     | int          | %8.0g          | cs_sex_                | Sex                                                                                              |
| cs_state                   | byte         | %28.0g         | cs_state_              | State of residence                                                                               |
| cs_area_type               | byte         | %8.0g          | cs_area_type_          | I live in an area that is                                                                        |
| cs_edu                     | byte         | %20.0g         | cs_edu_                | Highest level of education attained                                                              |
| cs_thoughts                | byte         | %115.0g        | cs_thoughts_           | What are your thoughts about being told (by a health professional) about genetic                 |
| cs_letter1_thoughts        | byte         | %101.0g        | cs_letter1_thoughts_   | You may have noticed that the letter (Letter 1) did not say which genetic condition              |
| cs_letter1_thoughts_other  | str636       | %636s          |                        | Please elaborate                                                                                 |
| cs_letter1_difficulty      | byte         | %29.0g         | cs_letter1_difficulty_ | How easy was Letter 1 to understand?                                                             |
| cs_letter2_thoughts        | byte         | %74.0g         | cs_letter2_thoughts_   | This letter (Letter 2) is similar to Letter 1 but contains more information about                |
| cs_letter2_thoughts_other  | str636       | %636s          |                        | Please elaborate                                                                                 |
| cs_letter2_difficulty      | byte         | %29.0g         | cs_letter2_difficulty_ | How easy was Letter 2 to understand?                                                             |
| cs_letter_preference       | byte         | %62.0g         | cs_letter_preference_  | Having read both letters, which letter do you prefer?                                            |
| cs_letters_comments        | str754       | %754s          |                        | Do you have any other comments about the two letters - for example, were there any               |
| cs_contact_preference      | byte         | %122.0g        | cs_contact_preference_ | If you had the option to choose how you received this letter, which would you prefer?            |
| cs_contact_preferences     | str753       | %753s          |                        | Do you have any comments (optional)?                                                             |
| cs_privacy_concerns        | byte         | %68.0g         | cs_privacy_concerns_   | Would you have any privacy concerns about being sent a letter directly by a health professional? |
| cs_privacy_concerns_little | str218       | %218s          |                        | Please elaborate                                                                                 |

```

cs_privacy_co~f str307 %307s          Please elaborate
cs_non_priv_c~s byte %69.0g          cs_non_priv_concerns_
                                     Would you have any other (non-privacy related) concerns about being sent
                                     lette
cs_non_priv_c~f str190 %190s          Please elaborate
cs_non_priv_c~e str193 %193s          Please elaborate
cs_contact_ways str7 %9s             There are several ways of contacting family members who are unaware of t
                                     ris
cs_contact_wa~e byte %17.0g          cs_contact_ways_preference_
                                     Which of these ways of being contacted by a health professional would yo
                                     prefer
cs_fam Contac~e byte %8.0g           cs_fam_contact_preference_
                                     If a health professional contacted you in one of these ways, would you p
                                     th
cs_fam Contac~s str387 %387s          If you answered [cs_fam_contact_preference], please provide an optional
                                     comment
cs_general_co~s str439 %439s          Do you have any final comments about any of the matters raised in this
                                     questionn
notification_~1 byte %10.0g          notification_of_medi_v_1_
                                     Complete?
    
```

Sorted by:

Note: Dataset has changed since last saved.

```

88 .
89 . *****
90 . *Data Analysis
91 .
92 . **Descriptive stats**
93 .
94 . replace cs_birth_year = . if record_id == 404
    (1 real change made, 1 to missing)

95 . generate currentyear = 2023

96 . generate age = currentyear - cs_birth_year
    (23 missing values generated)

97 . tab age, missing
    
```

| age | Freq. | Percent | Cum.  |
|-----|-------|---------|-------|
| 18  | 1     | 0.10    | 0.10  |
| 19  | 5     | 0.49    | 0.58  |
| 20  | 10    | 0.97    | 1.55  |
| 21  | 13    | 1.26    | 2.82  |
| 22  | 10    | 0.97    | 3.79  |
| 23  | 26    | 2.52    | 6.31  |
| 24  | 20    | 1.94    | 8.25  |
| 25  | 15    | 1.46    | 9.71  |
| 26  | 15    | 1.46    | 11.17 |
| 27  | 16    | 1.55    | 12.72 |
| 28  | 12    | 1.17    | 13.88 |
| 29  | 14    | 1.36    | 15.24 |
| 30  | 10    | 0.97    | 16.21 |
| 31  | 18    | 1.75    | 17.96 |
| 32  | 18    | 1.75    | 19.71 |
| 33  | 29    | 2.82    | 22.52 |
| 34  | 26    | 2.52    | 25.05 |
| 35  | 24    | 2.33    | 27.38 |
| 36  | 19    | 1.84    | 29.22 |
| 37  | 14    | 1.36    | 30.58 |
| 38  | 26    | 2.52    | 33.11 |
| 39  | 21    | 2.04    | 35.15 |
| 40  | 14    | 1.36    | 36.50 |
| 41  | 29    | 2.82    | 39.32 |
| 42  | 26    | 2.52    | 41.84 |
| 43  | 25    | 2.43    | 44.27 |
| 44  | 19    | 1.84    | 46.12 |
| 45  | 14    | 1.36    | 47.48 |
| 46  | 21    | 2.04    | 49.51 |
| 47  | 19    | 1.84    | 51.36 |
| 48  | 14    | 1.36    | 52.72 |
| 49  | 20    | 1.94    | 54.66 |

|       |       |        |        |
|-------|-------|--------|--------|
| 50    | 21    | 2.04   | 56.70  |
| 51    | 19    | 1.84   | 58.54  |
| 52    | 17    | 1.65   | 60.19  |
| 53    | 20    | 1.94   | 62.14  |
| 54    | 20    | 1.94   | 64.08  |
| 55    | 18    | 1.75   | 65.83  |
| 56    | 13    | 1.26   | 67.09  |
| 57    | 16    | 1.55   | 68.64  |
| 58    | 13    | 1.26   | 69.90  |
| 59    | 17    | 1.65   | 71.55  |
| 60    | 15    | 1.46   | 73.01  |
| 61    | 6     | 0.58   | 73.59  |
| 62    | 14    | 1.36   | 74.95  |
| 63    | 19    | 1.84   | 76.80  |
| 64    | 19    | 1.84   | 78.64  |
| 65    | 16    | 1.55   | 80.19  |
| 66    | 17    | 1.65   | 81.84  |
| 67    | 11    | 1.07   | 82.91  |
| 68    | 17    | 1.65   | 84.56  |
| 69    | 8     | 0.78   | 85.34  |
| 70    | 16    | 1.55   | 86.89  |
| 71    | 10    | 0.97   | 87.86  |
| 72    | 11    | 1.07   | 88.93  |
| 73    | 16    | 1.55   | 90.49  |
| 74    | 14    | 1.36   | 91.84  |
| 75    | 7     | 0.68   | 92.52  |
| 76    | 8     | 0.78   | 93.30  |
| 77    | 9     | 0.87   | 94.17  |
| 78    | 7     | 0.68   | 94.85  |
| 79    | 7     | 0.68   | 95.53  |
| 80    | 9     | 0.87   | 96.41  |
| 81    | 2     | 0.19   | 96.60  |
| 82    | 1     | 0.10   | 96.70  |
| 83    | 1     | 0.10   | 96.80  |
| 84    | 3     | 0.29   | 97.09  |
| 85    | 2     | 0.19   | 97.28  |
| 86    | 1     | 0.10   | 97.38  |
| 87    | 3     | 0.29   | 97.67  |
| 88    | 1     | 0.10   | 97.77  |
| .     | 23    | 2.23   | 100.00 |
| <hr/> |       |        |        |
| Total | 1,030 | 100.00 |        |

```

98 .
99 . generate cs_age_range = age
    (23 missing values generated)

100 . recode cs_age_range(18/25 = 1) (26/40 = 2) (41/60 = 3) (61/80 = 4) (81/max = 5)
    (1007 changes made to cs_age_range)

101 . label define age_lbl 1 "18-24" 2 "25-40" 3 "41-60" 4 "61-80" 5 ">81"

102 . label values cs_age_range age_lbl

103 . mean age

```

Mean estimation Number of obs = 1,007

|     | Mean     | Std. err. | [95% conf. interval] |          |
|-----|----------|-----------|----------------------|----------|
| age | 47.74479 | .5231878  | 46.71812             | 48.77145 |

```
104 .
105 . tab cs_age_range
```

| cs_age_range | Freq. | Percent | Cum.   |
|--------------|-------|---------|--------|
| 18-24        | 100   | 9.93    | 9.93   |
| 25-40        | 276   | 27.41   | 37.34  |
| 41-60        | 376   | 37.34   | 74.68  |
| 61-80        | 241   | 23.93   | 98.61  |
| >81          | 14    | 1.39    | 100.00 |
| Total        | 1,007 | 100.00  |        |

```
106 .
107 . tab cs_sex
```

| Sex    | Freq. | Percent | Cum.   |
|--------|-------|---------|--------|
| Male   | 502   | 49.22   | 49.22  |
| Female | 514   | 50.39   | 99.61  |
| Other  | 4     | 0.39    | 100.00 |
| Total  | 1,020 | 100.00  |        |

```
108 . *graph pie, over(cs_sex)
109 . *graph export "graphs/pie_sex.png", as(png) name("Graph") replace
110 .
111 . tab cs_state
```

| State of residence           | Freq. | Percent | Cum.   |
|------------------------------|-------|---------|--------|
| Australian Capital Territory | 22    | 2.20    | 2.20   |
| New South Wales              | 325   | 32.50   | 34.70  |
| Northern Territory           | 2     | 0.20    | 34.90  |
| Queensland                   | 201   | 20.10   | 55.00  |
| South Australia              | 81    | 8.10    | 63.10  |
| Tasmania                     | 20    | 2.00    | 65.10  |
| Victoria                     | 254   | 25.40   | 90.50  |
| Western Australia            | 95    | 9.50    | 100.00 |
| Total                        | 1,000 | 100.00  |        |

```
112 . *graph pie, over(cs_state)
113 . *graph export "graphs/pie_state.png", as(png) name("Graph") replace
114 .
115 . tab cs_area_type
```

| I live in an area that is | Freq. | Percent | Cum.   |
|---------------------------|-------|---------|--------|
| Rural                     | 263   | 26.17   | 26.17  |
| Urban                     | 742   | 73.83   | 100.00 |
| Total                     | 1,005 | 100.00  |        |

```
116 . *graph pie, over(cs_area_type)
117 . *graph export "graphs/bar_area.png", as(png) name("Graph") replace
118 .
119 . tab cs_edu
```

| Highest level of education attained | Freq. | Percent | Cum.   |
|-------------------------------------|-------|---------|--------|
| Before year 12                      | 135   | 13.18   | 13.18  |
| Year 12                             | 186   | 18.16   | 31.35  |
| TAFE/diploma                        | 327   | 31.93   | 63.28  |
| Undergraduate degree                | 247   | 24.12   | 87.40  |
| Post-graduate degree                | 129   | 12.60   | 100.00 |
| Total                               | 1,024 | 100.00  |        |

```
120 . *graph bar (count), over(cs_edu)
121 . *graph export "graphs/bar_edu.png", as(png) name("Graph") replace
122 .
123 . tab cs_thoughts
```

| What are your thoughts about being told<br>(by a health professional) about<br>genetic | Freq. | Percent | Cum.   |
|----------------------------------------------------------------------------------------|-------|---------|--------|
| I would want to be contacted and told t                                                | 496   | 48.16   | 48.16  |
| I would want to be contacted and told u                                                | 376   | 36.50   | 84.66  |
| I would not want to be contacted to be                                                 | 158   | 15.34   | 100.00 |
| Total                                                                                  | 1,030 | 100.00  |        |

```
124 .
125 . tab cs_letter1_thoughts
```

| You may have noticed that the letter<br>(Letter 1) did not say which genetic<br>condit | Freq. | Percent | Cum.   |
|----------------------------------------------------------------------------------------|-------|---------|--------|
| I would have felt better informed if th                                                | 749   | 72.72   | 72.72  |
| Including the genetic condition in the                                                 | 250   | 24.27   | 96.99  |
| Other (please elaborate) {cs_letter1_th                                                | 31    | 3.01    | 100.00 |
| Total                                                                                  | 1,030 | 100.00  |        |

```
126 .
127 . tab cs_letter1_difficulty
```

| How easy was Letter 1 to<br>understand? | Freq. | Percent | Cum.   |
|-----------------------------------------|-------|---------|--------|
| Very easy to understand                 | 428   | 41.55   | 41.55  |
| Easy enough to understand               | 497   | 48.25   | 89.81  |
| A bit difficult to understand           | 89    | 8.64    | 98.45  |
| Very difficult to understand            | 16    | 1.55    | 100.00 |
| Total                                   | 1,030 | 100.00  |        |

```
128 .
129 . tab cs_letter2_thoughts
```

| This letter (Letter 2) is similar to<br>Letter 1 but contains more information<br>about | Freq. | Percent | Cum.   |
|-----------------------------------------------------------------------------------------|-------|---------|--------|
| I felt better informed from this letter                                                 | 775   | 75.24   | 75.24  |
| It felt overwhelming to have that level                                                 | 231   | 22.43   | 97.67  |
| Other (please elaborate) {cs_letter2_th                                                 | 24    | 2.33    | 100.00 |
| Total                                                                                   | 1,030 | 100.00  |        |

```
130 .
131 . tab cs_letter2_difficulty
```

| How easy was Letter 2 to<br>understand? | Freq. | Percent | Cum.   |
|-----------------------------------------|-------|---------|--------|
| Very easy to understand                 | 454   | 44.08   | 44.08  |
| Easy enough to understand               | 473   | 45.92   | 90.00  |
| A bit difficult to understand           | 91    | 8.83    | 98.83  |
| Very difficult to understand            | 12    | 1.17    | 100.00 |
| Total                                   | 1,030 | 100.00  |        |



132 .  
 133 . tab cs\_letter\_preference

| Having read both letters, which letter do you prefer? | Freq. | Percent | Cum.   |
|-------------------------------------------------------|-------|---------|--------|
| Letter 1 (no specific information about               | 217   | 21.07   | 21.07  |
| Letter 2 (specific information about th               | 691   | 67.09   | 88.16  |
| No preference                                         | 122   | 11.84   | 100.00 |
| Total                                                 | 1,030 | 100.00  |        |

134 .  
 135 . tab cs\_contact\_preference

| If you had the option to choose how you received this letter, which would you pr | Freq. | Percent | Cum.   |
|----------------------------------------------------------------------------------|-------|---------|--------|
| A health professional sent me the lette                                          | 467   | 45.34   | 45.34  |
| My family member provided me with the l                                          | 87    | 8.45    | 53.79  |
| A health professional sent me the lette                                          | 237   | 23.01   | 76.80  |
| It would depend on who the family membe                                          | 106   | 10.29   | 87.09  |
| I wouldnt mind whether a family member                                           | 91    | 8.83    | 95.92  |
| I would prefer not to be told this info                                          | 42    | 4.08    | 100.00 |
| Total                                                                            | 1,030 | 100.00  |        |

136 .  
 137 . tab cs\_privacy\_concerns

| Would you have any privacy concerns about being sent a letter directly by a heal | Freq. | Percent | Cum.   |
|----------------------------------------------------------------------------------|-------|---------|--------|
| No concerns                                                                      | 878   | 85.24   | 85.24  |
| A little concern (please elaborate) {cs                                          | 104   | 10.10   | 95.34  |
| Significant concerns (please elaborate)                                          | 48    | 4.66    | 100.00 |
| Total                                                                            | 1,030 | 100.00  |        |

138 .  
 139 . tab cs\_non\_priv\_concerns

| Would you have any other (non-privacy related) concerns about being sent a lette | Freq. | Percent | Cum.   |
|----------------------------------------------------------------------------------|-------|---------|--------|
| No concerns                                                                      | 946   | 91.84   | 91.84  |
| A little concern (please elaborate) {cs                                          | 57    | 5.53    | 97.38  |
| Significant concerns (please elaborate)                                          | 27    | 2.62    | 100.00 |
| Total                                                                            | 1,030 | 100.00  |        |

140 .  
 141 . tab cs\_contact\_ways

| There are several ways of contacting family members who are unaware of their ris | Freq. | Percent | Cum.  |
|----------------------------------------------------------------------------------|-------|---------|-------|
| 0                                                                                | 54    | 5.24    | 5.24  |
| 1                                                                                | 121   | 11.75   | 16.99 |
| 1,2                                                                              | 23    | 2.23    | 19.22 |
| 1,2,3                                                                            | 10    | 0.97    | 20.19 |
| 1,2,3,4                                                                          | 39    | 3.79    | 23.98 |
| 1,2,4                                                                            | 3     | 0.29    | 24.27 |
| 1,3                                                                              | 81    | 7.86    | 32.14 |

|       |       |        |        |
|-------|-------|--------|--------|
| 1,3,4 | 64    | 6.21   | 38.35  |
| 1,4   | 26    | 2.52   | 40.87  |
| 2     | 54    | 5.24   | 46.12  |
| 2,3   | 5     | 0.49   | 46.60  |
| 2,3,4 | 16    | 1.55   | 48.16  |
| 2,4   | 8     | 0.78   | 48.93  |
| 3     | 303   | 29.42  | 78.35  |
| 3,4   | 121   | 11.75  | 90.10  |
| 4     | 102   | 9.90   | 100.00 |
| Total | 1,030 | 100.00 |        |

```
142 .
143 . tab cs_contact_ways_preference
```

| Which of these ways of being contacted by a health professional would you prefer | Freq. | Percent | Cum.   |
|----------------------------------------------------------------------------------|-------|---------|--------|
| None                                                                             | 42    | 4.08    | 4.08   |
| A phone call                                                                     | 220   | 21.36   | 25.44  |
| A text message                                                                   | 72    | 6.99    | 32.43  |
| A letter by post                                                                 | 418   | 40.58   | 73.01  |
| A letter by email                                                                | 240   | 23.30   | 96.31  |
| No preference                                                                    | 38    | 3.69    | 100.00 |
| Total                                                                            | 1,030 | 100.00  |        |

```
144 .
145 .
146 .
147 . *****Cross tabs*****
148 .
149 . tab cs_thoughts cs_state, col
```

|                          |
|--------------------------|
| Key                      |
| <i>frequency</i>         |
| <i>column percentage</i> |

| What are your thoughts about being told (by a health professional) about genetic | State of residence |               |             |               |              |              |               |              |   |
|----------------------------------------------------------------------------------|--------------------|---------------|-------------|---------------|--------------|--------------|---------------|--------------|---|
|                                                                                  | Australia          | New South     | Northern    | Queenslan     | South Aus    | Tasmania     | Victoria      | Western A    | T |
| I would want to be co                                                            | 10<br>45.45        | 149<br>45.85  | 1<br>50.00  | 90<br>44.78   | 43<br>53.09  | 12<br>60.00  | 129<br>50.79  | 46<br>48.42  | 4 |
| I would want to be co                                                            | 9<br>40.91         | 113<br>34.77  | 1<br>50.00  | 82<br>40.80   | 31<br>38.27  | 7<br>35.00   | 92<br>36.22   | 32<br>33.68  | 3 |
| I would not want to b                                                            | 3<br>13.64         | 63<br>19.38   | 0<br>0.00   | 29<br>14.43   | 7<br>8.64    | 1<br>5.00    | 33<br>12.99   | 17<br>17.89  | 1 |
| Total                                                                            | 22<br>100.00       | 325<br>100.00 | 2<br>100.00 | 201<br>100.00 | 81<br>100.00 | 20<br>100.00 | 254<br>100.00 | 95<br>100.00 | 1 |

150 . tab cs\_thoughts cs\_area\_type, col

|                                              |
|----------------------------------------------|
| Key                                          |
| <i>frequency</i><br><i>column percentage</i> |

| What are your thoughts about being told (by a health professional) about genetic | I live in an area that is   |                             | Total                         |
|----------------------------------------------------------------------------------|-----------------------------|-----------------------------|-------------------------------|
|                                                                                  | Rural                       | Urban                       |                               |
| I would want to be co                                                            | <b>117</b><br><b>44.49</b>  | <b>365</b><br><b>49.19</b>  | <b>482</b><br><b>47.96</b>    |
| I would want to be co                                                            | <b>102</b><br><b>38.78</b>  | <b>269</b><br><b>36.25</b>  | <b>371</b><br><b>36.92</b>    |
| I would not want to b                                                            | <b>44</b><br><b>16.73</b>   | <b>108</b><br><b>14.56</b>  | <b>152</b><br><b>15.12</b>    |
| Total                                                                            | <b>263</b><br><b>100.00</b> | <b>742</b><br><b>100.00</b> | <b>1,005</b><br><b>100.00</b> |

151 .

152 .

153 . tab cs\_letter1\_thoughts cs\_sex, col

|                                              |
|----------------------------------------------|
| Key                                          |
| <i>frequency</i><br><i>column percentage</i> |

| You may have noticed that the letter (Letter 1) did not say which genetic condit | Male                        | Sex                         |                           | Total                         |
|----------------------------------------------------------------------------------|-----------------------------|-----------------------------|---------------------------|-------------------------------|
|                                                                                  |                             | Female                      | Other                     |                               |
| I would have felt bet                                                            | <b>372</b><br><b>74.10</b>  | <b>366</b><br><b>71.21</b>  | <b>3</b><br><b>75.00</b>  | <b>741</b><br><b>72.65</b>    |
| Including the genetic                                                            | <b>109</b><br><b>21.71</b>  | <b>138</b><br><b>26.85</b>  | <b>1</b><br><b>25.00</b>  | <b>248</b><br><b>24.31</b>    |
| Other (please elabora                                                            | <b>21</b><br><b>4.18</b>    | <b>10</b><br><b>1.95</b>    | <b>0</b><br><b>0.00</b>   | <b>31</b><br><b>3.04</b>      |
| Total                                                                            | <b>502</b><br><b>100.00</b> | <b>514</b><br><b>100.00</b> | <b>4</b><br><b>100.00</b> | <b>1,020</b><br><b>100.00</b> |

154 .

155 .

156 . tab cs\_letter1\_difficulty cs\_edu, col

|                                              |
|----------------------------------------------|
| Key                                          |
| <i>frequency</i><br><i>column percentage</i> |

| How easy was Letter 1 to understand? | Highest level of education attained |               |               |               |               | Total           |
|--------------------------------------|-------------------------------------|---------------|---------------|---------------|---------------|-----------------|
|                                      | Before ye                           | Year 12       | TAFE/dipl     | Undergrad     | Post-grad     |                 |
| Very easy to understa                | 50<br>37.04                         | 70<br>37.63   | 142<br>43.43  | 107<br>43.32  | 55<br>42.64   | 424<br>41.41    |
| Easy enough to unders                | 68<br>50.37                         | 97<br>52.15   | 158<br>48.32  | 118<br>47.77  | 55<br>42.64   | 496<br>48.44    |
| A bit difficult to un                | 17<br>12.59                         | 14<br>7.53    | 21<br>6.42    | 21<br>8.50    | 15<br>11.63   | 88<br>8.59      |
| Very difficult to und                | 0<br>0.00                           | 5<br>2.69     | 6<br>1.83     | 1<br>0.40     | 4<br>3.10     | 16<br>1.56      |
| Total                                | 135<br>100.00                       | 186<br>100.00 | 327<br>100.00 | 247<br>100.00 | 129<br>100.00 | 1,024<br>100.00 |

```
157 . tab cs_letter2_difficulty cs_edu, col
```

|                          |
|--------------------------|
| Key                      |
| <i>frequency</i>         |
| <i>column percentage</i> |

| How easy was Letter 2 to understand? | Highest level of education attained |               |               |               |               | Total           |
|--------------------------------------|-------------------------------------|---------------|---------------|---------------|---------------|-----------------|
|                                      | Before ye                           | Year 12       | TAFE/dipl     | Undergrad     | Post-grad     |                 |
| Very easy to understa                | 56<br>41.48                         | 76<br>40.86   | 144<br>44.04  | 109<br>44.13  | 66<br>51.16   | 451<br>44.04    |
| Easy enough to unders                | 68<br>50.37                         | 86<br>46.24   | 153<br>46.79  | 115<br>46.56  | 49<br>37.98   | 471<br>46.00    |
| A bit difficult to un                | 11<br>8.15                          | 22<br>11.83   | 26<br>7.95    | 21<br>8.50    | 10<br>7.75    | 90<br>8.79      |
| Very difficult to und                | 0<br>0.00                           | 2<br>1.08     | 4<br>1.22     | 2<br>0.81     | 4<br>3.10     | 12<br>1.17      |
| Total                                | 135<br>100.00                       | 186<br>100.00 | 327<br>100.00 | 247<br>100.00 | 129<br>100.00 | 1,024<br>100.00 |

```
158 . tab cs_letter1_difficulty cs_letter2_difficulty, col
```

|                          |
|--------------------------|
| Key                      |
| <i>frequency</i>         |
| <i>column percentage</i> |

| How easy was Letter 1 to understand? | How easy was Letter 2 to understand? |               |              |              | Total           |
|--------------------------------------|--------------------------------------|---------------|--------------|--------------|-----------------|
|                                      | Very easy                            | Easy enou     | A bit dif    | Very diff    |                 |
| Very easy to understa                | 365<br>80.40                         | 58<br>12.26   | 5<br>5.49    | 0<br>0.00    | 428<br>41.55    |
| Easy enough to unders                | 80<br>17.62                          | 382<br>80.76  | 33<br>36.26  | 2<br>16.67   | 497<br>48.25    |
| A bit difficult to un                | 8<br>1.76                            | 31<br>6.55    | 46<br>50.55  | 4<br>33.33   | 89<br>8.64      |
| Very difficult to und                | 1<br>0.22                            | 2<br>0.42     | 7<br>7.69    | 6<br>50.00   | 16<br>1.55      |
| Total                                | 454<br>100.00                        | 473<br>100.00 | 91<br>100.00 | 12<br>100.00 | 1,030<br>100.00 |

```
159 .
160 .
161 . tab cs_letter_preference cs_edu,col
```

|                          |
|--------------------------|
| Key                      |
| <i>frequency</i>         |
| <i>column percentage</i> |

| Having read both letters, which letter do you prefer? | Highest level of education attained |               |               |               |               | Total           |
|-------------------------------------------------------|-------------------------------------|---------------|---------------|---------------|---------------|-----------------|
|                                                       | Before ye                           | Year 12       | TAFE/dipl     | Undergrad     | Post-grad     |                 |
| Letter 1 (no specific                                 | 28<br>20.74                         | 36<br>19.35   | 74<br>22.63   | 52<br>21.05   | 26<br>20.16   | 216<br>21.09    |
| Letter 2 (specific in                                 | 85<br>62.96                         | 129<br>69.35  | 214<br>65.44  | 175<br>70.85  | 85<br>65.89   | 688<br>67.19    |
| No preference                                         | 22<br>16.30                         | 21<br>11.29   | 39<br>11.93   | 20<br>8.10    | 18<br>13.95   | 120<br>11.72    |
| Total                                                 | 135<br>100.00                       | 186<br>100.00 | 327<br>100.00 | 247<br>100.00 | 129<br>100.00 | 1,024<br>100.00 |

```
162 . tab cs_letter_preference cs_sex, col
```

|                          |
|--------------------------|
| Key                      |
| <i>frequency</i>         |
| <i>column percentage</i> |

| Having read both letters, which letter do you prefer? | Sex           |               |             | Total           |
|-------------------------------------------------------|---------------|---------------|-------------|-----------------|
|                                                       | Male          | Female        | Other       |                 |
| Letter 1 (no specific                                 | 102<br>20.32  | 113<br>21.98  | 1<br>25.00  | 216<br>21.18    |
| Letter 2 (specific in                                 | 336<br>66.93  | 346<br>67.32  | 2<br>50.00  | 684<br>67.06    |
| No preference                                         | 64<br>12.75   | 55<br>10.70   | 1<br>25.00  | 120<br>11.76    |
| Total                                                 | 502<br>100.00 | 514<br>100.00 | 4<br>100.00 | 1,020<br>100.00 |

```
163 . tab cs_letter_preference cs_age_range, col
```

|                          |
|--------------------------|
| Key                      |
| <i>frequency</i>         |
| <i>column percentage</i> |

| Having read both letters, which letter do you prefer? | cs_age_range |              |              |              |             | Total        |
|-------------------------------------------------------|--------------|--------------|--------------|--------------|-------------|--------------|
|                                                       | 18-24        | 25-40        | 41-60        | 61-80        | >81         |              |
| Letter 1 (no specific                                 | 26<br>26.00  | 70<br>25.36  | 80<br>21.28  | 32<br>13.28  | 1<br>7.14   | 209<br>20.75 |
| Letter 2 (specific in                                 | 63<br>63.00  | 181<br>65.58 | 245<br>65.16 | 178<br>73.86 | 11<br>78.57 | 678<br>67.33 |
| No preference                                         | 11<br>11.00  | 25<br>9.06   | 51<br>13.56  | 31<br>12.86  | 2<br>14.29  | 120<br>11.92 |

|       |        |        |        |        |        |        |
|-------|--------|--------|--------|--------|--------|--------|
| Total | 100    | 276    | 376    | 241    | 14     | 1,007  |
|       | 100.00 | 100.00 | 100.00 | 100.00 | 100.00 | 100.00 |

```
164 .
165 . tab cs_privacy_concerns cs_edu, col
```

|                                              |
|----------------------------------------------|
| Key                                          |
| <i>frequency</i><br><i>column percentage</i> |

| Would you have any privacy concerns about being sent a letter directly by a heal | Highest level of education attained |               |               |               |               | Total           |
|----------------------------------------------------------------------------------|-------------------------------------|---------------|---------------|---------------|---------------|-----------------|
|                                                                                  | Before ye                           | Year 12       | TAFE/dipl     | Undergrad     | Post-grad     |                 |
| No concerns                                                                      | 122<br>90.37                        | 163<br>87.63  | 289<br>88.38  | 197<br>79.76  | 101<br>78.29  | 872<br>85.16    |
| A little concern (ple                                                            | 8<br>5.93                           | 19<br>10.22   | 29<br>8.87    | 32<br>12.96   | 16<br>12.40   | 104<br>10.16    |
| Significant concerns                                                             | 5<br>3.70                           | 4<br>2.15     | 9<br>2.75     | 18<br>7.29    | 12<br>9.30    | 48<br>4.69      |
| Total                                                                            | 135<br>100.00                       | 186<br>100.00 | 327<br>100.00 | 247<br>100.00 | 129<br>100.00 | 1,024<br>100.00 |

```
166 . tab cs_privacy_concerns cs_sex, col
```

|                                              |
|----------------------------------------------|
| Key                                          |
| <i>frequency</i><br><i>column percentage</i> |

| Would you have any privacy concerns about being sent a letter directly by a heal | Sex           |               |             | Total           |
|----------------------------------------------------------------------------------|---------------|---------------|-------------|-----------------|
|                                                                                  | Male          | Female        | Other       |                 |
| No concerns                                                                      | 429<br>85.46  | 436<br>84.82  | 4<br>100.00 | 869<br>85.20    |
| A little concern (ple                                                            | 47<br>9.36    | 56<br>10.89   | 0<br>0.00   | 103<br>10.10    |
| Significant concerns                                                             | 26<br>5.18    | 22<br>4.28    | 0<br>0.00   | 48<br>4.71      |
| Total                                                                            | 502<br>100.00 | 514<br>100.00 | 4<br>100.00 | 1,020<br>100.00 |

```
167 . tab cs_privacy_concerns cs_area_type, col
```

|                                              |
|----------------------------------------------|
| Key                                          |
| <i>frequency</i><br><i>column percentage</i> |

| Would you have any privacy concerns about being sent a letter directly by a heal | I live in an area that is |               | Total           |
|----------------------------------------------------------------------------------|---------------------------|---------------|-----------------|
|                                                                                  | Rural                     | Urban         |                 |
| No concerns                                                                      | 240<br>91.25              | 614<br>82.75  | 854<br>84.98    |
| A little concern (ple                                                            | 16<br>6.08                | 87<br>11.73   | 103<br>10.25    |
| Significant concerns                                                             | 7<br>2.66                 | 41<br>5.53    | 48<br>4.78      |
| Total                                                                            | 263<br>100.00             | 742<br>100.00 | 1,005<br>100.00 |

168 . tab cs\_privacy\_concerns cs\_state, col

|                                              |
|----------------------------------------------|
| Key                                          |
| <i>frequency</i><br><i>column percentage</i> |

| Would you have any privacy concerns about being sent a letter directly by a heal | State of residence |               |             |               |              |              |               |              |    |
|----------------------------------------------------------------------------------|--------------------|---------------|-------------|---------------|--------------|--------------|---------------|--------------|----|
|                                                                                  | Australia          | New South     | Northern    | Queenslan     | South Aus    | Tasmania     | Victoria      | Western A    | T  |
| No concerns                                                                      | 20<br>90.91        | 277<br>85.23  | 2<br>100.00 | 172<br>85.57  | 68<br>83.95  | 20<br>100.00 | 216<br>85.04  | 78<br>82.11  | 8  |
| A little concern (ple                                                            | 2<br>9.09          | 31<br>9.54    | 0<br>0.00   | 17<br>8.46    | 10<br>12.35  | 0<br>0.00    | 28<br>11.02   | 12<br>12.63  | 1  |
| Significant concerns                                                             | 0<br>0.00          | 17<br>5.23    | 0<br>0.00   | 12<br>5.97    | 3<br>3.70    | 0<br>0.00    | 10<br>3.94    | 5<br>5.26    | .  |
| Total                                                                            | 22<br>100.00       | 325<br>100.00 | 2<br>100.00 | 201<br>100.00 | 81<br>100.00 | 20<br>100.00 | 254<br>100.00 | 95<br>100.00 | 10 |

169 . tab cs\_privacy\_concerns cs\_age\_range, col

|                                              |
|----------------------------------------------|
| Key                                          |
| <i>frequency</i><br><i>column percentage</i> |

| Would you have any privacy concerns about being sent a letter directly by a heal | cs_age_range  |               |               |               |              | Total           |
|----------------------------------------------------------------------------------|---------------|---------------|---------------|---------------|--------------|-----------------|
|                                                                                  | 18-24         | 25-40         | 41-60         | 61-80         | >81          |                 |
| No concerns                                                                      | 89<br>89.00   | 232<br>84.06  | 313<br>83.24  | 209<br>86.72  | 14<br>100.00 | 857<br>85.10    |
| A little concern (ple                                                            | 9<br>9.00     | 33<br>11.96   | 43<br>11.44   | 18<br>7.47    | 0<br>0.00    | 103<br>10.23    |
| Significant concerns                                                             | 2<br>2.00     | 11<br>3.99    | 20<br>5.32    | 14<br>5.81    | 0<br>0.00    | 47<br>4.67      |
| Total                                                                            | 100<br>100.00 | 276<br>100.00 | 376<br>100.00 | 241<br>100.00 | 14<br>100.00 | 1,007<br>100.00 |

170 . tab cs\_privacy\_concerns cs\_thoughts, col

|                                              |
|----------------------------------------------|
| Key                                          |
| <i>frequency</i><br><i>column percentage</i> |

| Would you have any privacy concerns about being sent a letter directly by a heal | What are your thoughts about being told (by a health professional) about genetic |               |               | Total           |
|----------------------------------------------------------------------------------|----------------------------------------------------------------------------------|---------------|---------------|-----------------|
|                                                                                  | I would w                                                                        | I would w     | I would n     |                 |
| No concerns                                                                      | 431<br>86.90                                                                     | 322<br>85.64  | 125<br>79.11  | 878<br>85.24    |
| A little concern (ple                                                            | 48<br>9.68                                                                       | 40<br>10.64   | 16<br>10.13   | 104<br>10.10    |
| Significant concerns                                                             | 17<br>3.43                                                                       | 14<br>3.72    | 17<br>10.76   | 48<br>4.66      |
| Total                                                                            | 496<br>100.00                                                                    | 376<br>100.00 | 158<br>100.00 | 1,030<br>100.00 |

171 . tab cs\_privacy\_concerns cs\_non\_priv\_concerns, col

|                                              |
|----------------------------------------------|
| Key                                          |
| <i>frequency</i><br><i>column percentage</i> |

| Would you have any privacy concerns about being sent a letter directly by a heal | Would you have any other (non-privacy related) concerns about being sent a lette |              |              | Total           |
|----------------------------------------------------------------------------------|----------------------------------------------------------------------------------|--------------|--------------|-----------------|
|                                                                                  | No concer                                                                        | A little     | Significa    |                 |
| No concerns                                                                      | 855<br>90.38                                                                     | 22<br>38.60  | 1<br>3.70    | 878<br>85.24    |
| A little concern (ple                                                            | 73<br>7.72                                                                       | 29<br>50.88  | 2<br>7.41    | 104<br>10.10    |
| Significant concerns                                                             | 18<br>1.90                                                                       | 6<br>10.53   | 24<br>88.89  | 48<br>4.66      |
| Total                                                                            | 946<br>100.00                                                                    | 57<br>100.00 | 27<br>100.00 | 1,030<br>100.00 |

172 .

173 . tab cs\_non\_priv\_concerns cs\_age\_range, col

|                                              |
|----------------------------------------------|
| Key                                          |
| <i>frequency</i><br><i>column percentage</i> |



| Would you have any other (non-privacy related) concerns about being sent a letter | cs_age_range  |               |               |               |              | Total           |
|-----------------------------------------------------------------------------------|---------------|---------------|---------------|---------------|--------------|-----------------|
|                                                                                   | 18-24         | 25-40         | 41-60         | 61-80         | >81          |                 |
| No concerns                                                                       | 95<br>95.00   | 250<br>90.58  | 344<br>91.49  | 222<br>92.12  | 14<br>100.00 | 925<br>91.86    |
| A little concern (please)                                                         | 5<br>5.00     | 19<br>6.88    | 19<br>5.05    | 12<br>4.98    | 0<br>0.00    | 55<br>5.46      |
| Significant concerns                                                              | 0<br>0.00     | 7<br>2.54     | 13<br>3.46    | 7<br>2.90     | 0<br>0.00    | 27<br>2.68      |
| Total                                                                             | 100<br>100.00 | 276<br>100.00 | 376<br>100.00 | 241<br>100.00 | 14<br>100.00 | 1,007<br>100.00 |

174 . tab cs\_non\_priv\_concerns cs\_thoughts, col

|                                              |
|----------------------------------------------|
| Key                                          |
| <i>frequency</i><br><i>column percentage</i> |

| Would you have any other (non-privacy related) concerns about being sent a letter | What are your thoughts about being told (by a health professional) about genetic |               |               | Total           |
|-----------------------------------------------------------------------------------|----------------------------------------------------------------------------------|---------------|---------------|-----------------|
|                                                                                   | I would w                                                                        | I would w     | I would n     |                 |
| No concerns                                                                       | 459<br>92.54                                                                     | 346<br>92.02  | 141<br>89.24  | 946<br>91.84    |
| A little concern (please)                                                         | 25<br>5.04                                                                       | 23<br>6.12    | 9<br>5.70     | 57<br>5.53      |
| Significant concerns                                                              | 12<br>2.42                                                                       | 7<br>1.86     | 8<br>5.06     | 27<br>2.62      |
| Total                                                                             | 496<br>100.00                                                                    | 376<br>100.00 | 158<br>100.00 | 1,030<br>100.00 |

175 . tab cs\_non\_priv\_concerns cs\_edu, col

|                                              |
|----------------------------------------------|
| Key                                          |
| <i>frequency</i><br><i>column percentage</i> |

| Would you have any other (non-privacy related) concerns about being sent a letter | Highest level of education attained |               |               |               |               | Total           |
|-----------------------------------------------------------------------------------|-------------------------------------|---------------|---------------|---------------|---------------|-----------------|
|                                                                                   | Before ye                           | Year 12       | TAFE/dipl     | Undergrad     | Post-grad     |                 |
| No concerns                                                                       | 127<br>94.07                        | 179<br>96.24  | 304<br>92.97  | 221<br>89.47  | 109<br>84.50  | 940<br>91.80    |
| A little concern (please)                                                         | 6<br>4.44                           | 5<br>2.69     | 17<br>5.20    | 15<br>6.07    | 14<br>10.85   | 57<br>5.57      |
| Significant concerns                                                              | 2<br>1.48                           | 2<br>1.08     | 6<br>1.83     | 11<br>4.45    | 6<br>4.65     | 27<br>2.64      |
| Total                                                                             | 135<br>100.00                       | 186<br>100.00 | 327<br>100.00 | 247<br>100.00 | 129<br>100.00 | 1,024<br>100.00 |

176 .  
 177 . tab cs\_contact\_ways\_preference cs\_age\_range, col

|                                              |
|----------------------------------------------|
| Key                                          |
| <i>frequency</i><br><i>column percentage</i> |

| Which of these ways of being contacted by a health professional would you prefer | cs_age_range  |               |               |               |              | Total           |
|----------------------------------------------------------------------------------|---------------|---------------|---------------|---------------|--------------|-----------------|
|                                                                                  | 18-24         | 25-40         | 41-60         | 61-80         | >81          |                 |
| None                                                                             | 4<br>4.00     | 11<br>3.99    | 16<br>4.26    | 10<br>4.15    | 0<br>0.00    | 41<br>4.07      |
| A phone call                                                                     | 22<br>22.00   | 62<br>22.46   | 78<br>20.74   | 50<br>20.75   | 3<br>21.43   | 215<br>21.35    |
| A text message                                                                   | 17<br>17.00   | 31<br>11.23   | 16<br>4.26    | 6<br>2.49     | 0<br>0.00    | 70<br>6.95      |
| A letter by post                                                                 | 32<br>32.00   | 87<br>31.52   | 152<br>40.43  | 127<br>52.70  | 9<br>64.29   | 407<br>40.42    |
| A letter by email                                                                | 22<br>22.00   | 76<br>27.54   | 96<br>25.53   | 44<br>18.26   | 0<br>0.00    | 238<br>23.63    |
| No preference                                                                    | 3<br>3.00     | 9<br>3.26     | 18<br>4.79    | 4<br>1.66     | 2<br>14.29   | 36<br>3.57      |
| Total                                                                            | 100<br>100.00 | 276<br>100.00 | 376<br>100.00 | 241<br>100.00 | 14<br>100.00 | 1,007<br>100.00 |

178 . tab cs\_contact\_ways\_preference cs\_area\_type, col

|                                              |
|----------------------------------------------|
| Key                                          |
| <i>frequency</i><br><i>column percentage</i> |

| Which of these ways of being contacted by a health professional would you prefer | I live in an area that is |               | Total           |
|----------------------------------------------------------------------------------|---------------------------|---------------|-----------------|
|                                                                                  | Rural                     | Urban         |                 |
| None                                                                             | 9<br>3.42                 | 30<br>4.04    | 39<br>3.88      |
| A phone call                                                                     | 65<br>24.71               | 154<br>20.75  | 219<br>21.79    |
| A text message                                                                   | 22<br>8.37                | 48<br>6.47    | 70<br>6.97      |
| A letter by post                                                                 | 110<br>41.83              | 297<br>40.03  | 407<br>40.50    |
| A letter by email                                                                | 45<br>17.11               | 190<br>25.61  | 235<br>23.38    |
| No preference                                                                    | 12<br>4.56                | 23<br>3.10    | 35<br>3.48      |
| Total                                                                            | 263<br>100.00             | 742<br>100.00 | 1,005<br>100.00 |

179 . tab cs\_contact\_ways\_preference cs\_sex, col

|                                              |
|----------------------------------------------|
| Key                                          |
| <i>frequency</i><br><i>column percentage</i> |

| Which of these ways of being contacted by a health professional would you prefer | Sex           |               |             | Total           |
|----------------------------------------------------------------------------------|---------------|---------------|-------------|-----------------|
|                                                                                  | Male          | Female        | Other       |                 |
| None                                                                             | 29<br>5.78    | 13<br>2.53    | 0<br>0.00   | 42<br>4.12      |
| A phone call                                                                     | 107<br>21.31  | 111<br>21.60  | 0<br>0.00   | 218<br>21.37    |
| A text message                                                                   | 34<br>6.77    | 37<br>7.20    | 1<br>25.00  | 72<br>7.06      |
| A letter by post                                                                 | 198<br>39.44  | 213<br>41.44  | 1<br>25.00  | 412<br>40.39    |
| A letter by email                                                                | 112<br>22.31  | 125<br>24.32  | 2<br>50.00  | 239<br>23.43    |
| No preference                                                                    | 22<br>4.38    | 15<br>2.92    | 0<br>0.00   | 37<br>3.63      |
| Total                                                                            | 502<br>100.00 | 514<br>100.00 | 4<br>100.00 | 1,020<br>100.00 |

180 .

181 . tab cs\_fam\_contact\_preference cs\_sex, col

|                                              |
|----------------------------------------------|
| Key                                          |
| <i>frequency</i><br><i>column percentage</i> |

| If a health professional contacted you in one of these ways, would you prefer th | Sex           |               |             | Total           |
|----------------------------------------------------------------------------------|---------------|---------------|-------------|-----------------|
|                                                                                  | Male          | Female        | Other       |                 |
| No                                                                               | 185<br>36.85  | 137<br>26.65  | 3<br>75.00  | 325<br>31.86    |
| Yes                                                                              | 214<br>42.63  | 254<br>49.42  | 1<br>25.00  | 469<br>45.98    |
| Unsure                                                                           | 103<br>20.52  | 123<br>23.93  | 0<br>0.00   | 226<br>22.16    |
| Total                                                                            | 502<br>100.00 | 514<br>100.00 | 4<br>100.00 | 1,020<br>100.00 |

182 . tab cs\_fam\_contact\_preference cs\_age\_range, col

|                                              |
|----------------------------------------------|
| Key                                          |
| <i>frequency</i><br><i>column percentage</i> |

| If a health professional contacted you in one of these ways, would you prefer th | cs_age_range  |               |               |               |              | Total           |
|----------------------------------------------------------------------------------|---------------|---------------|---------------|---------------|--------------|-----------------|
|                                                                                  | 18-24         | 25-40         | 41-60         | 61-80         | >81          |                 |
| No                                                                               | 30<br>30.00   | 86<br>31.16   | 108<br>28.72  | 93<br>38.59   | 5<br>35.71   | 322<br>31.98    |
| Yes                                                                              | 52<br>52.00   | 124<br>44.93  | 166<br>44.15  | 112<br>46.47  | 8<br>57.14   | 462<br>45.88    |
| Unsure                                                                           | 18<br>18.00   | 66<br>23.91   | 102<br>27.13  | 36<br>14.94   | 1<br>7.14    | 223<br>22.14    |
| Total                                                                            | 100<br>100.00 | 276<br>100.00 | 376<br>100.00 | 241<br>100.00 | 14<br>100.00 | 1,007<br>100.00 |

183 .

184 . tab cs\_letter1\_thoughts cs\_letter2\_thoughts, col

|                                              |
|----------------------------------------------|
| Key                                          |
| <i>frequency</i><br><i>column percentage</i> |

| You may have noticed that the letter (Letter 1) did not say which genetic condit | This letter (Letter 2) is similar to Letter 1 but contains more information about |               |              | Total           |
|----------------------------------------------------------------------------------|-----------------------------------------------------------------------------------|---------------|--------------|-----------------|
|                                                                                  | I felt be                                                                         | It felt o     | Other (pl    |                 |
| I would have felt bet                                                            | 662<br>85.42                                                                      | 83<br>35.93   | 4<br>16.67   | 749<br>72.72    |
| Including the genetic                                                            | 103<br>13.29                                                                      | 146<br>63.20  | 1<br>4.17    | 250<br>24.27    |
| Other (please elabora                                                            | 10<br>1.29                                                                        | 2<br>0.87     | 19<br>79.17  | 31<br>3.01      |
| Total                                                                            | 775<br>100.00                                                                     | 231<br>100.00 | 24<br>100.00 | 1,030<br>100.00 |

185 . tab cs\_letter1\_thoughts cs\_letter\_preference, col

|                                              |
|----------------------------------------------|
| Key                                          |
| <i>frequency</i><br><i>column percentage</i> |

| You may have noticed that the letter (Letter 1) did not say which genetic condit | Having read both letters, which letter do you prefer? |               |               | Total           |
|----------------------------------------------------------------------------------|-------------------------------------------------------|---------------|---------------|-----------------|
|                                                                                  | Letter 1                                              | Letter 2      | No prefer     |                 |
| I would have felt bet                                                            | 114<br>52.53                                          | 568<br>82.20  | 67<br>54.92   | 749<br>72.72    |
| Including the genetic                                                            | 99<br>45.62                                           | 113<br>16.35  | 38<br>31.15   | 250<br>24.27    |
| Other (please elabora                                                            | 4<br>1.84                                             | 10<br>1.45    | 17<br>13.93   | 31<br>3.01      |
| Total                                                                            | 217<br>100.00                                         | 691<br>100.00 | 122<br>100.00 | 1,030<br>100.00 |

```
186 . tab cs_letter2_thoughts cs_letter_preference, col
```

|                          |
|--------------------------|
| Key                      |
| <i>frequency</i>         |
| <i>column percentage</i> |

| This letter (Letter 2) is similar to Letter 1 but contains more information about | Having read both letters, which letter do you prefer? |               |               | Total           |
|-----------------------------------------------------------------------------------|-------------------------------------------------------|---------------|---------------|-----------------|
|                                                                                   | Letter 1                                              | Letter 2      | No prefer     |                 |
| I felt better informe                                                             | 99<br>45.62                                           | 613<br>88.71  | 63<br>51.64   | 775<br>75.24    |
| It felt overwhelming                                                              | 114<br>52.53                                          | 73<br>10.56   | 44<br>36.07   | 231<br>22.43    |
| Other (please elabora                                                             | 4<br>1.84                                             | 5<br>0.72     | 15<br>12.30   | 24<br>2.33      |
| Total                                                                             | 217<br>100.00                                         | 691<br>100.00 | 122<br>100.00 | 1,030<br>100.00 |

```
187 .
188 .
189 .
190 . *****Graphs*****
191 .
192 . graph bar (count), over(cs_thoughts)

193 . graph export "graphs/bar_thoughts.png", as(png) name("Graph") replace
file /Users/keri.finlay/Documents/Stata/graphs/bar_thoughts.png saved as PNG format

194 .
195 . graph bar (count) cs_letter1_thoughts cs_letter2_thoughts, over (cs_thoughts)

196 . graph export "graphs/bar_letter12thoughts.png", as(png) name("Graph") replace
file /Users/keri.finlay/Documents/Stata/graphs/bar_letter12thoughts.png saved as PNG format

197 .
198 . generate cs_contact_pref_1 = 1 if cs_contact_ways == "1", after(cs_contact_ways)
(909 missing values generated)
```

```
199 . replace cs_contact_pref_1 = 1 if cs_contact_ways == "1,2"
    (23 real changes made)

200 . replace cs_contact_pref_1 = 1 if cs_contact_ways == "1,3"
    (81 real changes made)

201 . replace cs_contact_pref_1 = 1 if cs_contact_ways == "1,4"
    (26 real changes made)

202 . replace cs_contact_pref_1 = 1 if cs_contact_ways == "1,2,3"
    (10 real changes made)

203 . replace cs_contact_pref_1 = 1 if cs_contact_ways == "1,3,4"
    (64 real changes made)

204 . replace cs_contact_pref_1 = 1 if cs_contact_ways == "1,2,4"
    (3 real changes made)

205 . replace cs_contact_pref_1 = 1 if cs_contact_ways == "1,2,3,4"
    (39 real changes made)

206 . generate cs_contact_pref_2= 2 if cs_contact_ways == "2", after(cs_contact_pref_1)
    (976 missing values generated)

207 . replace cs_contact_pref_2 = 2 if cs_contact_ways == "1,2"
    (23 real changes made)

208 . replace cs_contact_pref_2 = 2 if cs_contact_ways == "2,3"
    (5 real changes made)

209 . replace cs_contact_pref_2 = 2 if cs_contact_ways == "2,4"
    (8 real changes made)

210 . replace cs_contact_pref_2 = 2 if cs_contact_ways == "1,2,3"
    (10 real changes made)

211 . replace cs_contact_pref_2 = 2 if cs_contact_ways == "1,2,4"
    (3 real changes made)

212 . replace cs_contact_pref_2 = 2 if cs_contact_ways == "2,3,4"
    (16 real changes made)

213 . replace cs_contact_pref_2 = 2 if cs_contact_ways == "1,2,3,4"
    (39 real changes made)

214 . generate cs_contact_pref_3 = 3 if cs_contact_ways == "3", after(cs_contact_pref_2)
    (727 missing values generated)

215 . replace cs_contact_pref_3 = 3 if cs_contact_ways == "1,3"
    (81 real changes made)

216 . replace cs_contact_pref_3 = 3 if cs_contact_ways == "2,3"
    (5 real changes made)

217 . replace cs_contact_pref_3 = 3 if cs_contact_ways == "3,4"
    (121 real changes made)

218 . replace cs_contact_pref_3 = 3 if cs_contact_ways == "1,2,3"
    (10 real changes made)

219 . replace cs_contact_pref_3 = 3 if cs_contact_ways == "1,3,4"
    (64 real changes made)
```

```

220 . replace cs_contact_pref_3 = 3 if cs_contact_ways == "2,3,4"
    (16 real changes made)

221 . replace cs_contact_pref_3 = 3 if cs_contact_ways == "1,2,3,4"
    (39 real changes made)

222 . generate cs_contact_pref_4 = 4 if cs_contact_ways == "4", after(cs_contact_pref_3)
    (928 missing values generated)

223 . replace cs_contact_pref_4 = 4 if cs_contact_ways == "1,4"
    (26 real changes made)

224 . replace cs_contact_pref_4 = 4 if cs_contact_ways == "2,4"
    (8 real changes made)

225 . replace cs_contact_pref_4 = 4 if cs_contact_ways == "3,4"
    (121 real changes made)

226 . replace cs_contact_pref_4 = 4 if cs_contact_ways == "1,2,4"
    (3 real changes made)

227 . replace cs_contact_pref_4 = 4 if cs_contact_ways == "1,3,4"
    (64 real changes made)

228 . replace cs_contact_pref_4 = 4 if cs_contact_ways == "2,3,4"
    (16 real changes made)

229 . replace cs_contact_pref_4 = 4 if cs_contact_ways == "1,2,3,4"
    (39 real changes made)

```

```

230 .
231 . tab cs_contact_pref_1

```

| cs_contact_<br>pref_1 | Freq. | Percent | Cum.   |
|-----------------------|-------|---------|--------|
| 1                     | 367   | 100.00  | 100.00 |
| Total                 | 367   | 100.00  |        |

```

232 . tab cs_contact_pref_2

```

| cs_contact_<br>pref_2 | Freq. | Percent | Cum.   |
|-----------------------|-------|---------|--------|
| 2                     | 158   | 100.00  | 100.00 |
| Total                 | 158   | 100.00  |        |

```

233 . tab cs_contact_pref_3

```

| cs_contact_<br>pref_3 | Freq. | Percent | Cum.   |
|-----------------------|-------|---------|--------|
| 3                     | 639   | 100.00  | 100.00 |
| Total                 | 639   | 100.00  |        |

```

234 . tab cs_contact_pref_4

```

| cs_contact_<br>pref_4 | Freq. | Percent | Cum.   |
|-----------------------|-------|---------|--------|
| 4                     | 379   | 100.00  | 100.00 |
| Total                 | 379   | 100.00  |        |

```

235 .
236 . graph bar (count) cs_contact_pref_1 cs_contact_pref_2 cs_contact_pref_3 cs_contact_pref_4
237 . graph export "graphs/bar_contact_pref.png", as(png) name("Graph") replace
    file /Users/keri.finlay/Documents/Stata/graphs/bar_contact_pref.png saved as PNG format
238 .
239 . *****signifance tests*****
240 . tab cs_edu cs_privacy_concerns, chi
    
```

| Highest level of education attained | Would you have any privacy concerns about being sent a letter directly by a heal |          |           | Total |
|-------------------------------------|----------------------------------------------------------------------------------|----------|-----------|-------|
|                                     | No concer                                                                        | A little | Significa |       |
| Before year 12                      | 122                                                                              | 8        | 5         | 135   |
| Year 12                             | 163                                                                              | 19       | 4         | 186   |
| TAFE/diploma                        | 289                                                                              | 29       | 9         | 327   |
| Undergraduate degree                | 197                                                                              | 32       | 18        | 247   |
| Post-graduate degree                | 101                                                                              | 16       | 12        | 129   |
| Total                               | 872                                                                              | 104      | 48        | 1,024 |

Pearson chi2(8) = 22.8508 Pr = 0.004

```

241 . tab cs_edu cs_privacy_concerns, exp
    
```

|                           |
|---------------------------|
| Key                       |
| <i>frequency</i>          |
| <i>expected frequency</i> |

| Highest level of education attained | Would you have any privacy concerns about being sent a letter directly by a heal |              |            | Total            |
|-------------------------------------|----------------------------------------------------------------------------------|--------------|------------|------------------|
|                                     | No concer                                                                        | A little     | Significa  |                  |
| Before year 12                      | 122<br>115.0                                                                     | 8<br>13.7    | 5<br>6.3   | 135<br>135.0     |
| Year 12                             | 163<br>158.4                                                                     | 19<br>18.9   | 4<br>8.7   | 186<br>186.0     |
| TAFE/diploma                        | 289<br>278.5                                                                     | 29<br>33.2   | 9<br>15.3  | 327<br>327.0     |
| Undergraduate degree                | 197<br>210.3                                                                     | 32<br>25.1   | 18<br>11.6 | 247<br>247.0     |
| Post-graduate degree                | 101<br>109.9                                                                     | 16<br>13.1   | 12<br>6.0  | 129<br>129.0     |
| Total                               | 872<br>872.0                                                                     | 104<br>104.0 | 48<br>48.0 | 1,024<br>1,024.0 |

```

242 . tab cs_edu cs_non_priv_concerns, chi
    
```

| Highest level of education attained | Would you have any other (non-privacy related) concerns about being sent a lette |          |           | Total |
|-------------------------------------|----------------------------------------------------------------------------------|----------|-----------|-------|
|                                     | No concer                                                                        | A little | Significa |       |
| Before year 12                      | 127                                                                              | 6        | 2         | 135   |
| Year 12                             | 179                                                                              | 5        | 2         | 186   |
| TAFE/diploma                        | 304                                                                              | 17       | 6         | 327   |
| Undergraduate degree                | 221                                                                              | 15       | 11        | 247   |
| Post-graduate degree                | 109                                                                              | 14       | 6         | 129   |
| Total                               | 940                                                                              | 57       | 27        | 1,024 |

Pearson chi2(8) = 19.4392 Pr = 0.013



243 . tab cs\_edu cs\_non\_priv\_concerns, exp

|                           |
|---------------------------|
| Key                       |
| <i>frequency</i>          |
| <i>expected frequency</i> |

| Highest level of education attained | Would you have any other (non-privacy related) concerns about being sent a letter |            |            | Total            |
|-------------------------------------|-----------------------------------------------------------------------------------|------------|------------|------------------|
|                                     | No concer                                                                         | A little   | Significa  |                  |
| Before year 12                      | 127<br>123.9                                                                      | 6<br>7.5   | 2<br>3.6   | 135<br>135.0     |
| Year 12                             | 179<br>170.7                                                                      | 5<br>10.4  | 2<br>4.9   | 186<br>186.0     |
| TAFE/diploma                        | 304<br>300.2                                                                      | 17<br>18.2 | 6<br>8.6   | 327<br>327.0     |
| Undergraduate degree                | 221<br>226.7                                                                      | 15<br>13.7 | 11<br>6.5  | 247<br>247.0     |
| Post-graduate degree                | 109<br>118.4                                                                      | 14<br>7.2  | 6<br>3.4   | 129<br>129.0     |
| Total                               | 940<br>940.0                                                                      | 57<br>57.0 | 27<br>27.0 | 1,024<br>1,024.0 |

244 . tab cs\_edu cs\_letter\_preference, chi

| Highest level of education attained | Having read both letters, which letter do you prefer? |          |           | Total |
|-------------------------------------|-------------------------------------------------------|----------|-----------|-------|
|                                     | Letter 1                                              | Letter 2 | No prefer |       |
| Before year 12                      | 28                                                    | 85       | 22        | 135   |
| Year 12                             | 36                                                    | 129      | 21        | 186   |
| TAFE/diploma                        | 74                                                    | 214      | 39        | 327   |
| Undergraduate degree                | 52                                                    | 175      | 20        | 247   |
| Post-graduate degree                | 26                                                    | 85       | 18        | 129   |
| Total                               | 216                                                   | 688      | 120       | 1,024 |

Pearson chi2(8) = 7.6260 Pr = 0.471

245 . tab cs\_edu cs\_letter2\_difficulty, chi

| Highest level of education attained | How easy was Letter 2 to understand? |           |           |           | Total |
|-------------------------------------|--------------------------------------|-----------|-----------|-----------|-------|
|                                     | Very easy                            | Easy enou | A bit dif | Very diff |       |
| Before year 12                      | 56                                   | 68        | 11        | 0         | 135   |
| Year 12                             | 76                                   | 86        | 22        | 2         | 186   |
| TAFE/diploma                        | 144                                  | 153       | 26        | 4         | 327   |
| Undergraduate degree                | 109                                  | 115       | 21        | 2         | 247   |
| Post-graduate degree                | 66                                   | 49        | 10        | 4         | 129   |
| Total                               | 451                                  | 471       | 90        | 12        | 1,024 |

Pearson chi2(12) = 12.9759 Pr = 0.371

246 . tab cs\_edu cs\_letter1\_difficulty, chi

| Highest level of education attained | How easy was Letter 1 to understand? |           |           |           | Total |
|-------------------------------------|--------------------------------------|-----------|-----------|-----------|-------|
|                                     | Very easy                            | Easy enou | A bit dif | Very diff |       |
| Before year 12                      | 50                                   | 68        | 17        | 0         | 135   |
| Year 12                             | 70                                   | 97        | 14        | 5         | 186   |
| TAFE/diploma                        | 142                                  | 158       | 21        | 6         | 327   |
| Undergraduate degree                | 107                                  | 118       | 21        | 1         | 247   |
| Post-graduate degree                | 55                                   | 55        | 15        | 4         | 129   |
| Total                               | 424                                  | 496       | 88        | 16        | 1,024 |

Pearson chi2(12) = 17.1848 Pr = 0.143

247 . tab cs\_age\_range cs\_letter\_preference, chi

| cs_age_range | Having read both letters, which letter do you prefer? |          |           | Total |
|--------------|-------------------------------------------------------|----------|-----------|-------|
|              | Letter 1                                              | Letter 2 | No prefer |       |
| 18-24        | 26                                                    | 63       | 11        | 100   |
| 25-40        | 70                                                    | 181      | 25        | 276   |
| 41-60        | 80                                                    | 245      | 51        | 376   |
| 61-80        | 32                                                    | 178      | 31        | 241   |
| >81          | 1                                                     | 11       | 2         | 14    |
| Total        | 209                                                   | 678      | 120       | 1,007 |

Pearson chi2(8) = 17.4612 Pr = 0.026

248 . tab cs\_area\_type cs\_thoughts, chi

| I live in an area that is | What are your thoughts about being told (by a health professional) about genetic |           |           | Total |
|---------------------------|----------------------------------------------------------------------------------|-----------|-----------|-------|
|                           | I would w                                                                        | I would w | I would n |       |
| Rural                     | 117                                                                              | 102       | 44        | 263   |
| Urban                     | 365                                                                              | 269       | 108       | 742   |
| Total                     | 482                                                                              | 371       | 152       | 1,005 |

Pearson chi2(2) = 1.8400 Pr = 0.399

249 . tab cs\_fam\_contact\_preference cs\_sex, chi

| If a health professional contacted you in one of these ways, would you prefer th | Sex  |        |       | Total |
|----------------------------------------------------------------------------------|------|--------|-------|-------|
|                                                                                  | Male | Female | Other |       |
| No                                                                               | 185  | 137    | 3     | 325   |
| Yes                                                                              | 214  | 254    | 1     | 469   |
| Unsure                                                                           | 103  | 123    | 0     | 226   |
| Total                                                                            | 502  | 514    | 4     | 1,020 |

Pearson chi2(4) = 15.7888 Pr = 0.003

```
250 .  
    end of do-file
```

```
251 . log close  
      name: <unnamed>  
      log: /Users/keri.finlay/Documents/Stata/logfile_survey.smcl  
      log type: smcl  
      closed on: 15 Sep 2022, 13:46:36
```

---
